# Supplementary material for: Metabolic characteristics of saponins from Panax notoginseng leaves biotransformed by gut microbiota in rats
Source: Royal Society of Chemistry journal article supplement (doi:10.1039/d4ay01941e), 2025-01-01
Supplement: d4ay01941e1.pdf [file d4ay01941e1.pdf]

**Table. S1: UPLC-QTOF-MS/MS data of mixture standard ginsenosides in the positive ion mode**

| No. | t <sub>R</sub> | [M+H] <sup>+</sup> /<br>[M+Na] <sup>+</sup> | Δppm | Fragment ions in the positive mode                                                                     | Molecular<br>formular                           | Name                                    |
|-----|----------------|---------------------------------------------|------|--------------------------------------------------------------------------------------------------------|-------------------------------------------------|-----------------------------------------|
| 1   | 7.064          | 955.5224                                    | -0.8 | 775.4610, 661.4295, 203.0536                                                                           | C <sub>47</sub> H <sub>80</sub> O <sub>18</sub> | Notoginsenoside R <sub>1</sub>          |
| 2   | 7.567          | 823.4803                                    | -1.4 | 643.4179, 463.3464, 203.0518                                                                           | C <sub>42</sub> H <sub>72</sub> O <sub>14</sub> | Ginsenoside Rg <sub>1</sub>             |
| 3   | 7.495          | 969.5385                                    | -0.8 | 789.4749, 661.4337                                                                                     | C <sub>48</sub> H <sub>82</sub> O <sub>18</sub> | Ginsenoside Re                          |
| 4   | 10.442         | 1131.5923                                   | -0.1 | 789.4760                                                                                               | C <sub>54</sub> H <sub>92</sub> O <sub>23</sub> | Ginsenoside Rb <sub>1</sub>             |
| 6   | 10.84          | 1101.5812                                   | 1.2  | 789.4725                                                                                               | C <sub>53</sub> H <sub>92</sub> O <sub>22</sub> | Ginsenoside RC                          |
| 7   | 11.199         | 661.4294                                    | 0.4  | 481.3666                                                                                               | C <sub>36</sub> H <sub>62</sub> O <sub>9</sub>  | 20(R/S)-<br>Ginsenoside Rh <sub>1</sub> |
| 8   | 11.295         | 1101.5819                                   | 0.3  | 789.4725, 587.4156                                                                                     | C <sub>53</sub> H <sub>90</sub> O <sub>22</sub> | Ginsenoside Rb <sub>2</sub>             |
| 9   | 11.455         | 1101.5811                                   | -    | -                                                                                                      | C <sub>53</sub> H <sub>90</sub> O <sub>22</sub> | Ginsenoside Rb <sub>3</sub>             |
| 10  | 12.359         | 661.4282                                    | -    | -                                                                                                      | C <sub>36</sub> H <sub>62</sub> O <sub>9</sub>  | Ginsenoside F <sub>1</sub>              |
| 11  | 12.412         | 969.5390                                    | -1.4 | 789.4732, 645.4285, 203.0521                                                                           | C <sub>48</sub> H <sub>82</sub> O <sub>18</sub> | gypenoside XVII                         |
| 12  | 13.357         | 947.5571                                    | -0.3 | 767.4877, 605.4411, 443.3875                                                                           | C <sub>48</sub> H <sub>82</sub> O <sub>18</sub> | Ginsenoside Rd                          |
| 13  | 14.121         | 917.5463                                    | -0.5 | 767.4958, 605.4409, 443.3896                                                                           | C <sub>47</sub> H <sub>80</sub> O <sub>17</sub> | Notoginsenoside Fe                      |
| 14  | 14.665         | 917.5528                                    | -1.0 | 767.4946, 605.4418                                                                                     | C <sub>47</sub> H <sub>80</sub> O <sub>17</sub> | Ginsenoside Rd <sub>2</sub>             |
| 15  | 14.899         | 939.5276                                    | -    | -                                                                                                      | C <sub>47</sub> H <sub>80</sub> O <sub>17</sub> | Notoginsenoside Fd                      |
| 16  | 16.615         | 807.4855                                    | -    | -                                                                                                      | C <sub>42</sub> H <sub>72</sub> O <sub>13</sub> | Ginsenoside F <sub>2</sub>              |
| 17  | 18.402         | 785.5380                                    | -5.1 | 767.4930, 605.4430, 443.3891                                                                           | C <sub>42</sub> H <sub>72</sub> O <sub>13</sub> | GinsenosideRg <sub>3</sub>              |
| 18  | 20.32          | 953.7819                                    | -6.1 | 477.3964                                                                                               | C <sub>30</sub> H <sub>52</sub> O <sub>4</sub>  | PPT                                     |
| 19  | 23.857         | 645.4357                                    | -1.2 | 465.3717, 203.0529                                                                                     | C <sub>36</sub> H <sub>62</sub> O <sub>8</sub>  | Ginsenoside CK                          |
| 20  | 24.816         | 1245.8954                                   | -4.9 | 1227.8881[2M+H-H <sub>2</sub> O] <sup>+</sup> ,<br>1047.8254[2M+H-Glc-H <sub>2</sub> O] <sup>+</sup> , | C <sub>36</sub> H <sub>62</sub> O <sub>8</sub>  | 20(S)-Ginsenoside<br>Rh <sub>2</sub>    |

|    |        |           |      |                                                                                 |                                                |                                      |
|----|--------|-----------|------|---------------------------------------------------------------------------------|------------------------------------------------|--------------------------------------|
|    |        |           |      | 605.4415, 587.4305, 425.3778                                                    |                                                |                                      |
| 21 | 25.151 | 1245.8954 | -6.0 | 1227.8900[2M+H-H <sub>2</sub> O] <sup>+</sup> ,<br>605.4400, 587.4293, 425.3779 | C <sub>36</sub> H <sub>62</sub> O <sub>8</sub> | 20(R)-Ginsenoside<br>Rh <sub>2</sub> |
| 22 | 30.318 | 483.4054  | -7.4 | -                                                                               | C <sub>30</sub> H <sub>52</sub> O <sub>3</sub> | PPD                                  |

**Table. S2: UPLC-Q-TOF-MS/MS data of PNLs in the positive ion mode**

| No. | t <sub>R</sub> | [M+H] <sup>+</sup> /<br>[M+Na] <sup>+</sup> | Δppm | Fragment ions in the positive<br>mode                                     | Molecular<br>formular                           | Name                                                               |
|-----|----------------|---------------------------------------------|------|---------------------------------------------------------------------------|-------------------------------------------------|--------------------------------------------------------------------|
| P1  | 6.141          | 767.4583                                    | -4.6 | 605.4056, 443.3519, 425.3427                                              | C <sub>42</sub> H <sub>70</sub> O <sub>12</sub> | Ginsenoside Rg5/<br>Rk1/ isomer                                    |
| P2  | 8.271          | 1117.5744                                   | 4.1  | 897.5245, 805.4777,<br>765.4468, 443.3815                                 | C <sub>53</sub> H <sub>90</sub> O <sub>23</sub> | Gypenoside LVI/<br>Gypenoside LXVII/<br>Yesaninoside H /<br>isomer |
| P3  | 8.644          | 765.4784                                    | -    | 747.4658, 585.4161, 423.3628                                              | C <sub>42</sub> H <sub>70</sub> O <sub>12</sub> | Ginsenoside Rg5/<br>Rk1/ isomer                                    |
| P4  | 9.639          | 899.5424                                    | -4.7 | 695.4280, 443.3783                                                        | C <sub>47</sub> H <sub>78</sub> O <sub>16</sub> | Notoginsenoside<br>SFt3/ isomer                                    |
| P5  | 9.677          | 955.5204                                    | 0.6  | 335.0952                                                                  | C <sub>47</sub> H <sub>80</sub> O <sub>18</sub> | ginsenoside R1/ iso-<br>ginsenoside R1/ iso-<br>Notoginsenoside R1 |
| P6  | 9.849          | 1241.6640                                   | -    | 1061.5952[2M+H-Glc-H <sub>2</sub> O] <sup>+</sup> ,<br>619.2102, 457.1599 | C <sub>36</sub> H <sub>60</sub> O <sub>8</sub>  | iso-ginsenoside Rh4/<br>Rk3                                        |

|     |        |           |      |                                             |                                                 |                                                                                    |
|-----|--------|-----------|------|---------------------------------------------|-------------------------------------------------|------------------------------------------------------------------------------------|
| P7  | 10.054 | 925.5101  | 1.5  | 467.1370,                                   | C <sub>46</sub> H <sub>70</sub> O <sub>17</sub> | notoginsenoside<br>Rw1 /<br>chikusetsusaponin<br>L5/isomer                         |
| P8  | 10.267 | 1233.5403 | 2.4  | 921.5151, 335.0996                          | C <sub>58</sub> H <sub>98</sub> O <sub>26</sub> | Ginsenoside Ra1/<br>ginsenoside Ra2/<br>notoginsenoside Fc/<br>notoginsenoside FP2 |
| P9  | 10.342 | 1131.5942 | 1.5  | 789.4810, 365.1070                          | C <sub>54</sub> H <sub>92</sub> O <sub>23</sub> | Ginsenoside Rb1                                                                    |
| P10 | 10.772 | 1101.5807 | 0.4  | 789.4755, 335.0942                          | C <sub>53</sub> H <sub>90</sub> O <sub>22</sub> | Ginsenoside Rc                                                                     |
| P11 | 11.004 | 1187.5832 | -    | 1143.5966, 875.4792 ,<br>831.4842, 335.0970 | -                                               | Unknow                                                                             |
| P12 | 11.23  | 1101.5814 | 1.3  | 789.4750, 335.0955                          | C <sub>53</sub> H <sub>90</sub> O <sub>22</sub> | Ginsenoside Rb2                                                                    |
| P13 | 11.344 | 1101.5796 | 1.1  | 789.4730, 335.0952                          | C <sub>53</sub> H <sub>90</sub> O <sub>22</sub> | Ginsenoside Rb3                                                                    |
| P14 | 12.421 | 969.5413  | -1.6 | 879.4650, 789.4728                          | C <sub>48</sub> H <sub>82</sub> O <sub>18</sub> | gypenoside XVII                                                                    |
| P15 | 13.314 | 969.5419  | 1.2  | 365.1067                                    | C <sub>48</sub> H <sub>82</sub> O <sub>18</sub> | Ginsenoside Rd                                                                     |
| P16 | 14.112 | 939.5288  | 1.0  | 627.4052, 335.0939                          | C <sub>47</sub> H <sub>80</sub> O <sub>17</sub> | Notoginsenoside Fe                                                                 |
| P17 | 14.243 | 747.4244  | -    | 703.4326, 643.4142, 463.3540,<br>203.0520   | -                                               | Unknow                                                                             |
| P18 | 14.657 | 939.5302  | 1.5  | -                                           | C <sub>47</sub> H <sub>80</sub> O <sub>17</sub> | Ginsenoside Rd2                                                                    |
| P19 | 14.825 | 939.5303  | 0.9  | 627.4195, 335.0949                          | C <sub>47</sub> H <sub>80</sub> O <sub>17</sub> | Notoginsenoside Fd                                                                 |

**Table. S3: UPLC-QTOF-MS/MS data of metabolites of PNLs in the control group in the positive ion mode**

| No. | t <sub>R</sub> | [M+H] <sup>+</sup> /<br>[M+Na] <sup>+</sup> | Δppm | Fragment ions in the positive<br>mode | Molecular<br>formular | Name |
|-----|----------------|---------------------------------------------|------|---------------------------------------|-----------------------|------|
|-----|----------------|---------------------------------------------|------|---------------------------------------|-----------------------|------|

|     |       |           |      |                                           |                                                 |                                                                                                                      |
|-----|-------|-----------|------|-------------------------------------------|-------------------------------------------------|----------------------------------------------------------------------------------------------------------------------|
| M1  | 6.975 | 962.5018  | -    | 800.4554, 650.4074,<br>606.4133, 474.3683 | -                                               | Unknow                                                                                                               |
| M2  | 7.09  | 911.4479  | -    | 467.215                                   | -                                               | Unknow                                                                                                               |
| M3  | 7.624 | 1107.5592 | -3   | 945.5130, 783.4524,<br>765.4433, 203.1790 | C <sub>54</sub> H <sub>90</sub> O <sub>23</sub> | Ginsenoside Rb <sub>1</sub>                                                                                          |
| M4  | 8.16  | 945.5079  | -0.4 | 783.4711, 747.4412, 615.3872              | C <sub>47</sub> H <sub>76</sub> O <sub>19</sub> | iso-Notoginsenoside<br>Rw <sub>1</sub> +Ace-2H                                                                       |
| M5  | 8.237 | 945.5054  | -3.8 | 813.4685, 633.3984                        | C <sub>48</sub> H <sub>80</sub> O <sub>18</sub> | Unknow                                                                                                               |
| M6  | 8.414 | 915.4941  | -3.9 | 783.4708, 765.4349                        | C <sub>47</sub> H <sub>80</sub> O <sub>17</sub> | Gypenoside IX/<br>Notoginsenoside Ft <sub>1</sub> /<br>Vinaginsenoside R <sub>16</sub> / R <sub>17</sub> /<br>isomer |
| M7  | 8.568 | 975.5229  | -    | 813.4573, 795.4314,<br>651.4019, 501.1392 | -                                               | Unknow                                                                                                               |
| M8  | 8.851 | 765.4768  | -3.2 | 747.4738, 585.2865, 423.3702              | C <sub>42</sub> H <sub>70</sub> O <sub>12</sub> | Ginsenoside Rg <sub>5</sub> / Rk <sub>1</sub> /<br>isomer                                                            |
| M9  | 8.986 | 639.3243  | -0.4 | 621.4359 441.3715, 423.3645               | C <sub>36</sub> H <sub>62</sub> O <sub>9</sub>  | iso-Ginsenoside Rh <sub>1</sub>                                                                                      |
| M10 | 9.063 | 783.4717  | -0.5 | 765.4808, 441.3695, 423.3585              | C <sub>42</sub> H <sub>72</sub> O <sub>13</sub> | iso-Ginsenoside Rg <sub>3</sub>                                                                                      |
| M11 | 9.139 | 959.5241  | -0.6 | 813.4420, 797.4566, 475.3759              | C <sub>48</sub> H <sub>82</sub> O <sub>19</sub> | Notoginsenoside R <sub>3</sub> / R <sub>6</sub> /<br>N/ M/ 20-O-<br>glucoginsenoside Rf/<br>isomer                   |
| M12 | 9.354 | 959.5058  | -1.3 | 813.4701, 615.3672, 475.3793              | C <sub>48</sub> H <sub>82</sub> O <sub>19</sub> | Notoginsenoside R <sub>3</sub> / R <sub>6</sub> /<br>N/ M/ 20-O-<br>glucoginsenoside Rf/<br>isomer                   |

|     |        |           |      |                                       |  |                                                 |                                                                                                                     |
|-----|--------|-----------|------|---------------------------------------|--|-------------------------------------------------|---------------------------------------------------------------------------------------------------------------------|
| M13 | 10.106 | 956.5277  | -    | -                                     |  | C <sub>47</sub> H <sub>80</sub> O <sub>18</sub> | ginsenoside R <sub>1</sub> / iso-ginsenoside R <sub>1</sub> / iso-Notoginsenoside R <sub>1</sub>                    |
| M14 | 10.32  | 957.5183  | -3.6 | 811.4459, 649.3932                    |  | C <sub>47</sub> H <sub>82</sub> O <sub>18</sub> | ginsenoside R <sub>1</sub> +2H/ iso-ginsenoside R <sub>1</sub> +2H/ iso-Notoginsenoside R <sub>1</sub> +2H          |
| M15 | 10.359 | 955.5244  | 1.5  | 643.4170, 335.0947                    |  | C <sub>47</sub> H <sub>80</sub> O <sub>18</sub> | ginsenoside R <sub>1</sub> / iso-ginsenoside R <sub>1</sub> / iso-Notoginsenoside R <sub>1</sub>                    |
| M16 | 10.492 | 975.515   | -3.7 | 813.4659, 651.4055, 475.3733          |  | C <sub>49</sub> H <sub>82</sub> O <sub>19</sub> | ginsenoside R <sub>1</sub> +Acety/ iso-ginsenoside R <sub>1</sub> +Acety/ iso-Notoginsenoside R <sub>1</sub> +Acety |
| M17 | 10.935 | 1233.6215 | -1.9 | -                                     |  | C <sub>58</sub> H <sub>98</sub> O <sub>26</sub> | Ginsenoside Ra <sub>1</sub> / ginsenoside Ra <sub>2</sub> / notoginsenoside Fc/ notoginsenoside FP <sub>2</sub>     |
| M18 | 10.955 | 899.5322  | 1.5  | 737.4799, 605.4400, 443.3850          |  | C <sub>47</sub> H <sub>78</sub> O <sub>16</sub> | Notoginsenoside SFt <sub>3</sub> / isomer                                                                           |
| M19 | 11     | 1101.5816 | 0    | -                                     |  | C <sub>53</sub> H <sub>90</sub> O <sub>22</sub> | Ginsenoside Rc                                                                                                      |
| M20 | 11.455 | 1101.5835 | 1.2  | 789.4794, 335.0955                    |  | C <sub>53</sub> H <sub>90</sub> O <sub>22</sub> | Ginsenoside Rb <sub>2</sub>                                                                                         |
| M21 | 11.512 | 823.4828  | -0.6 | 643.4171, 203.0550                    |  | C <sub>42</sub> H <sub>72</sub> O <sub>14</sub> | iso-ginsenoside Rf/ iso-ginsenoside Rg <sub>1</sub>                                                                 |
| M22 | 11.513 | 953.5079  | -0.4 | 773.3179 641.3695, 335.0948, 203.0484 |  | C <sub>47</sub> H <sub>78</sub> O <sub>18</sub> | ginsenoside R <sub>1</sub> -2H/ iso-ginsenoside R <sub>1</sub> -2H/ iso-                                            |

|     |        |           |      |                                           |                                                 |                                                                                                                            |
|-----|--------|-----------|------|-------------------------------------------|-------------------------------------------------|----------------------------------------------------------------------------------------------------------------------------|
|     |        |           |      |                                           |                                                 | Notoginsenoside R <sub>1</sub> -2H                                                                                         |
| M23 | 11.571 | 1101.5822 | 1.3  | 789.4741, 335.0920                        | C <sub>53</sub> H <sub>90</sub> O <sub>22</sub> | Ginsenoside Rb <sub>3</sub>                                                                                                |
| M24 | 11.363 | 793.4281  | -4.1 | 335.0946                                  | C <sub>41</sub> H <sub>70</sub> O <sub>13</sub> | Notoginsenoside R <sub>2</sub> /<br>ginsenoside F <sub>3</sub> / F <sub>5</sub> / La/<br>Pseudoginsenoside RT <sub>3</sub> |
| M25 | 12.596 | 969.5392  | -0.6 | 789.4760, 645.4394, 203.0524              | C <sub>48</sub> H <sub>82</sub> O <sub>18</sub> | gypenoside XVII                                                                                                            |
| M26 | 13.233 | 1071.5747 | 3.4  | -                                         | C <sub>52</sub> H <sub>88</sub> O <sub>21</sub> | Pro-Gypenoside XLIX                                                                                                        |
| M27 | 13.313 | 1101.5794 | 0.7  | 789.4658, 335.1014                        | C <sub>53</sub> H <sub>90</sub> O <sub>22</sub> | Ginsenoside Rb <sub>3</sub> /<br>Notoginsenoside L/<br>isomer                                                              |
| M28 | 13.524 | 969.5378  | 0.5  | 627.4273, 365.1067, 305.0895              | C <sub>48</sub> H <sub>82</sub> O <sub>18</sub> | Ginsenoside Rd                                                                                                             |
| M29 | 13.62  | 1071.5681 | 0.5  | 759.4779, 467.1363, 335.0790              | C <sub>52</sub> H <sub>88</sub> O <sub>21</sub> | Notoginsenoside O/<br>isomer                                                                                               |
| M30 | 13.658 | 899.5555  | -1.2 | 767.5134, 737.4843,<br>605.4404, 443.3894 | C <sub>47</sub> H <sub>78</sub> O <sub>16</sub> | Notoginsenoside Fe-H <sub>2</sub> O/<br>isomer                                                                             |
| M31 | 13.792 | 1071.5704 | 0.5  | 759.4700, 663.2891,<br>467.1351, 335.0951 | C <sub>52</sub> H <sub>88</sub> O <sub>21</sub> | Notoginsenoside O/<br>isomer                                                                                               |
| M32 | 13.907 | 1101.588  | 0.9  | 789.4834, 335.0855                        | C <sub>53</sub> H <sub>90</sub> O <sub>22</sub> | Ginsenoside Rb <sub>3</sub> /<br>notoginsenoside L/<br>isomer                                                              |
| M33 | 14.156 | 943.5266  | 0.5  | 797.4698, 635.4161, 459.3835              | C <sub>48</sub> H <sub>78</sub> O <sub>18</sub> | Unknow                                                                                                                     |
| M34 | 14.294 | 939.5279  | -    | 335.0954                                  | C <sub>47</sub> H <sub>80</sub> O <sub>17</sub> | Notoginsenoside Fe                                                                                                         |
| M35 | 14.482 | 939.5288  | 0.2  | 789.4769, 627.4297,<br>335.0943, 203.9494 | C <sub>47</sub> H <sub>80</sub> O <sub>17</sub> | Notoginsenoside Fe/<br>isomer                                                                                              |
| M36 | 14.824 | 939.5276  | -0.5 | 355.0961                                  | C <sub>47</sub> H <sub>80</sub> O <sub>17</sub> | Ginsenoside Rd <sub>2</sub>                                                                                                |
| M37 | 14.743 | 939.5288  | 0.5  | -                                         | C <sub>47</sub> H <sub>80</sub> O <sub>17</sub> | Gypenoside IX/                                                                                                             |

|     |        |          |      |                              |                                                 |                                                                                                                      |
|-----|--------|----------|------|------------------------------|-------------------------------------------------|----------------------------------------------------------------------------------------------------------------------|
|     |        |          |      |                              |                                                 | Notoginsenoside Ft <sub>1</sub> /<br>Vinaginsenoside R <sub>16</sub> / R <sub>17</sub> /<br>isomer                   |
| M38 | 15.332 | 969.5368 | 0.1  | 789.4719, 527.1578, 423.3691 | C <sub>48</sub> H <sub>82</sub> O <sub>18</sub> | Notoginsenoside K/ iso-<br>Ginsenoside Re                                                                            |
| M39 | 15.482 | 661.4283 | -1.5 | 481.3651, 203.0510           | C <sub>36</sub> H <sub>62</sub> O <sub>9</sub>  | Ginsenoside F <sub>1</sub> / Rh <sub>1</sub> /<br>isomer                                                             |
| M40 | 15.56  | 767.4593 | -    | 459.3847, 441.3730           | -                                               | Unknow                                                                                                               |
| M41 | 15.713 | 939.5313 | -0.9 | 759.4665, 531.2771, 335.0958 | C <sub>47</sub> H <sub>80</sub> O <sub>17</sub> | Gypenoside IX/<br>Notoginsenoside Ft <sub>1</sub> /<br>Vinaginsenoside R <sub>16</sub> / R <sub>17</sub> /<br>isomer |
| M42 | 15.789 | 1011.552 | 0.8  | 831.4645, 789.4786, 407.1155 | C <sub>50</sub> H <sub>84</sub> O <sub>19</sub> | Ginsenoside Rd+Acety/<br>Notoginsenoside<br>K+Acety/ isomer                                                          |
| M43 | 15.902 | 939.5264 | 1.2  | 759.4655, 627.4204, 335.0947 | C <sub>47</sub> H <sub>80</sub> O <sub>17</sub> | Gypenoside IX/<br>Notoginsenoside Ft <sub>1</sub> /<br>Vinaginsenoside R <sub>16</sub> / R <sub>17</sub> /<br>isomer |
| M44 | 16.377 | 939.53   | 0.9  | 759.4592, 627.4712, 335.0928 | C <sub>47</sub> H <sub>80</sub> O <sub>17</sub> | Gypenoside IX/<br>Notoginsenoside Ft <sub>1</sub> /<br>Vinaginsenoside R <sub>16</sub> / R <sub>17</sub> /<br>isomer |
| M45 | 16.474 | 981.5398 | -3.7 | 849.5601, 669.4326, 335.0941 | C <sub>48</sub> H <sub>78</sub> O <sub>19</sub> | Gypenoside IX+Acetyl/<br>Notoginsenoside<br>Ft <sub>1</sub> +Acetyl/                                                 |

---

|     |        |          |      |                                                     |                                                 |                                                                                                                                             |
|-----|--------|----------|------|-----------------------------------------------------|-------------------------------------------------|---------------------------------------------------------------------------------------------------------------------------------------------|
| M46 | 16.548 | 661.4289 | 0    | 481.3655, 203.0505                                  | C <sub>36</sub> H <sub>62</sub> O <sub>9</sub>  | Vinaginsenoside<br>R <sub>16</sub> +Acetyl/ R <sub>17</sub> +Acetyl<br>Ginsenoside F <sub>1</sub> / Rh1/<br>isomer                          |
| M47 | 16.741 | 807.4878 | -1.6 | 627.4242, 203.0524                                  | C <sub>42</sub> H <sub>72</sub> O <sub>13</sub> | 20-S-Ginsenoside F <sub>2</sub>                                                                                                             |
| M48 | 17.041 | 1069.557 | 2.4  | 923.4999, 761.4465,<br>617.4016, 441.3727, 423.3624 | C <sub>52</sub> H <sub>86</sub> O <sub>21</sub> | Gypenoside XLIX/<br>isomer                                                                                                                  |
| M49 | 17.348 | 939.5312 | -2.7 | -                                                   | C <sub>47</sub> H <sub>80</sub> O <sub>17</sub> | Gypenoside IX/<br>Notoginsenoside Ft <sub>1</sub> /<br>Vinaginsenoside R <sub>16</sub> / R <sub>17</sub> /<br>isomer                        |
| M50 | 17.646 | 981.538  | -3.6 | 627.4171, 335.0786                                  | C <sub>48</sub> H <sub>78</sub> O <sub>19</sub> | Gypenoside IX+Acetyl/<br>Notoginsenoside<br>Ft <sub>1</sub> +Acetyl/<br>Vinaginsenoside<br>R <sub>16</sub> +Acetyl/ R <sub>17</sub> +Acetyl |
| M51 | 18.404 | 923.4971 | 3    | 761.4445, 599.3925, 441.3696                        | C <sub>46</sub> H <sub>76</sub> O <sub>17</sub> | Unknow                                                                                                                                      |
| M52 | 18.517 | 807.4871 | -0.6 | 749.4711, 425.3788                                  | C <sub>42</sub> H <sub>72</sub> O <sub>13</sub> | Ginsenoside Rg <sub>3</sub> / isomer                                                                                                        |
| M53 | 18.592 | 807.4863 | -0.6 | 365.1065                                            | C <sub>42</sub> H <sub>72</sub> O <sub>13</sub> | Ginsenoside Rg <sub>3</sub> / isomer                                                                                                        |
| M54 | 18.667 | 939.5294 | -0.1 | 807.4957, 335.0880                                  | C <sub>47</sub> H <sub>80</sub> O <sub>17</sub> | Gypenoside IX/<br>Notoginsenoside Ft <sub>1</sub> /<br>Vinaginsenoside R <sub>16</sub> / R <sub>17</sub> /<br>isomer                        |
| M55 | 18.876 | 849.498  | -0.9 | 669.4331, 203.0531                                  | C <sub>44</sub> H <sub>74</sub> O <sub>14</sub> | Acetyl -ginsenoside Rg <sub>3</sub>                                                                                                         |
| M56 | 19.046 | 981.5407 | -3.6 | 849.4843, 335.0961                                  | C <sub>48</sub> H <sub>78</sub> O <sub>19</sub> | Gypenoside IX+Acetyl/<br>Notoginsenoside                                                                                                    |

---



|     |        |          |      |                    |                                                 |                                                                                                                                             |
|-----|--------|----------|------|--------------------|-------------------------------------------------|---------------------------------------------------------------------------------------------------------------------------------------------|
|     |        |          |      |                    |                                                 | Ft <sub>1</sub> +Acetyl/<br>Vinaginsenoside<br>R <sub>16</sub> +Acetyl/ R <sub>17</sub> +Acetyl                                             |
| M57 | 19.742 | 793.4863 | -2.1 | 407.3694, 207.0654 | C <sub>41</sub> H <sub>70</sub> O <sub>13</sub> | Ginsenoside F <sub>3</sub> / F <sub>5</sub> /<br>Notoginsenoside R <sub>2</sub>                                                             |
| M58 | 19.838 | 981.5374 | -3.8 | -                  | C <sub>48</sub> H <sub>78</sub> O <sub>19</sub> | Gypenoside IX+Acetyl/<br>Notoginsenoside<br>Ft <sub>1</sub> +Acetyl/<br>Vinaginsenoside<br>R <sub>16</sub> +Acetyl/ R <sub>17</sub> +Acetyl |
| M59 | 19.952 | 777.4738 | -1.9 | 465.3677, 335.0943 | C <sub>41</sub> H <sub>70</sub> O <sub>12</sub> | Ginsenoside MC/<br>Ginsenoside compound Y                                                                                                   |
| M60 | 20.008 | 777.4742 | -1.4 | 465.3679, 335.0943 | C <sub>41</sub> H <sub>70</sub> O <sub>12</sub> | Ginsenoside MC/<br>Ginsenoside compound Y                                                                                                   |
| M61 | 20.121 | 777.4745 | -1.1 | 335.0952           | C <sub>41</sub> H <sub>70</sub> O <sub>12</sub> | Ginsenoside MC/<br>Ginsenoside compound Y                                                                                                   |
| M62 | 20.271 | 985.5284 | 1.5  | 805.4793, 365.3230 | C <sub>48</sub> H <sub>82</sub> O <sub>19</sub> | Notoginsenoside R <sub>3</sub> / R <sub>6</sub> /<br>N/ 20-O-<br>glucoginsenoside Rf/<br>isomer                                             |
| M63 | 20.517 | 777.4717 | -1.5 | 335.0943           | C <sub>41</sub> H <sub>70</sub> O <sub>12</sub> | Ginsenoside MC/<br>Ginsenoside compound Y                                                                                                   |
| M64 | 20.654 | 777.4742 | -0.8 | 335.0945           | C <sub>41</sub> H <sub>70</sub> O <sub>12</sub> | Ginsenoside MC/<br>Ginsenoside compound Y                                                                                                   |
| M65 | 20.69  | 793.4548 | -2.7 | 481.3651           | C <sub>41</sub> H <sub>70</sub> O <sub>13</sub> | Ginsenoside F <sub>3</sub> / F <sub>5</sub> /<br>Notoginsenoside R <sub>2</sub>                                                             |

|     |        |          |      |                              |                                                 |                                                                                                |
|-----|--------|----------|------|------------------------------|-------------------------------------------------|------------------------------------------------------------------------------------------------|
| M66 | 20.691 | 849.4971 | -0.3 | 627.4231, 501.2896, 245.0616 | C <sub>44</sub> H <sub>74</sub> O <sub>14</sub> | Ginsenoside Rs <sub>3</sub> / isomer                                                           |
| M67 | 21.099 | 807.5714 | -    | 415.2801                     | C <sub>42</sub> H <sub>72</sub> O <sub>13</sub> | iso-Ginsenoside Rg <sub>3</sub>                                                                |
| M68 | 21.158 | 921.5155 | -1   | 497.1473                     | C <sub>47</sub> H <sub>78</sub> O <sub>16</sub> | Notoginsenoside Ft <sub>1</sub> -<br>H <sub>2</sub> O/ isomer                                  |
| M69 | 21.629 | 921.5173 | -1.4 | 789.4819, 497.1481           | C <sub>47</sub> H <sub>78</sub> O <sub>16</sub> | Notoginsenoside Ft <sub>1</sub> -<br>H <sub>2</sub> O/ isomer                                  |
| M70 | 21.838 | 823.3158 | -2.6 | 691.4453, 529.3869, 203.1778 | C <sub>42</sub> H <sub>72</sub> O <sub>14</sub> | Ginsenoside Rf/ iso-<br>ginsenoside Rf/ iso-<br>ginsenoside Rg <sub>1</sub> /<br>Gypenoside LI |
| M71 | 22.104 | 643.418  | -1.3 | 463.3591, 203.0525           | C <sub>36</sub> H <sub>60</sub> O <sub>8</sub>  | iso-ginsenoside Rh <sub>4</sub> / Rk <sub>3</sub>                                              |
| M72 | 22.501 | 777.4768 | -3.5 | 335.0946                     | C <sub>41</sub> H <sub>70</sub> O <sub>12</sub> | Ginsenoside MC/<br>Ginsenoside compound Y                                                      |
| M73 | 23.11  | 789.4766 | -6.4 | 627.4311, 407.3535           | C <sub>42</sub> H <sub>70</sub> O <sub>12</sub> | Ginsenoside Rg <sub>5</sub> / Rk <sub>1</sub> /<br>isomer                                      |
| M74 | 23.259 | 499.3745 | -5.6 | -                            | C <sub>30</sub> H <sub>52</sub> O <sub>4</sub>  | PPT                                                                                            |
| M75 | 23.293 | 891.5023 | -0.2 | 669.4387, 335.0909, 245.0565 | C <sub>46</sub> H <sub>76</sub> O <sub>15</sub> | Koryoginsenoside R <sub>1</sub> /<br>isomer                                                    |
| M76 | 23.654 | 819.4869 | -0.5 | 465.3793, 377.1045           | C <sub>43</sub> H <sub>74</sub> O <sub>13</sub> | Ginsenoside MC+Acetyl/<br>Ginsenoside compound<br>Y+Acetyl/ isomer                             |
| M77 | 23.767 | 777.4726 | 0.1  | 535.5118, 335.0906           | C <sub>41</sub> H <sub>70</sub> O <sub>12</sub> | Ginsenoside MC/<br>Ginsenoside compound Y                                                      |
| M78 | 23.768 | 789.4738 | -0.4 | 669.4303, 203.0483           | C <sub>42</sub> H <sub>70</sub> O <sub>12</sub> | Ginsenoside Rg <sub>5</sub> / Rk <sub>1</sub> /<br>isomer                                      |
| M79 | 23.936 | 645.4334 | -1.2 | 465.3715, 203.0528           | C <sub>36</sub> H <sub>62</sub> O <sub>8</sub>  | Ginsenoside CK                                                                                 |

|     |        |          |      |                              |                                                 |                                                                                                    |
|-----|--------|----------|------|------------------------------|-------------------------------------------------|----------------------------------------------------------------------------------------------------|
| M80 | 24.107 | 1245.893 | -    | 623.4519, 443.3885           | C <sub>36</sub> H <sub>62</sub> O <sub>8</sub>  | Ginsenoside CK                                                                                     |
| M81 | 25.047 | 645.4323 | -1.5 | 465.3679, 203.0525           | C <sub>36</sub> H <sub>62</sub> O <sub>8</sub>  | 20-S-Ginsenoside Rh <sub>2</sub>                                                                   |
| M82 | 25.392 | 645.4335 | -0.9 | 465.3710, 203.0494           | C <sub>36</sub> H <sub>62</sub> O <sub>8</sub>  | 20-R-Ginsenoside Rh <sub>2</sub>                                                                   |
| M83 | 25.788 | 849.496  | 1.2  | 365.1064                     | C <sub>44</sub> H <sub>74</sub> O <sub>14</sub> | Ginsenoside Rs <sub>3</sub> / isomer                                                               |
| M84 | 26.22  | 643.4177 | -0.1 | 463.3545, 203.0518           | C <sub>36</sub> H <sub>60</sub> O <sub>8</sub>  | iso-ginsenoside Rh <sub>4</sub> / Rk <sub>3</sub>                                                  |
| M85 | 26.507 | 831.4862 | 0.5  | 407.1198                     | C <sub>44</sub> H <sub>72</sub> O <sub>13</sub> | Ginsenoside Rg <sub>5</sub> +Acetyl/<br>Rk <sub>1</sub> +Acetyl/ isomer                            |
| M86 | 26.667 | 831.4857 | -0.5 | 407.1195                     | C <sub>44</sub> H <sub>72</sub> O <sub>13</sub> | Ginsenoside Rg <sub>5</sub> +Acetyl/<br>Rk <sub>1</sub> +Acetyl/ isomer                            |
| M87 | 27.124 | 831.4875 | -0.6 | 515.3244, 407.1176           | C <sub>44</sub> H <sub>72</sub> O <sub>13</sub> | Ginsenoside Rg <sub>5</sub> +Acetyl/<br>Rk <sub>1</sub> +Acetyl/ isomer                            |
| M88 | 27.656 | 687.442  | -0.4 | 465.3711, 245.0620           | C <sub>38</sub> H <sub>64</sub> O <sub>9</sub>  | Ginsenoside CK/<br>Rh <sub>2</sub> +Acetyl                                                         |
| M89 | 27.675 | 819.4868 | -    | 465.3609, 335.0940           | -                                               | Unknow                                                                                             |
| M90 | 27.941 | 819.4858 | -    | 507.3809, 335.0946           | -                                               | Unknow                                                                                             |
| M91 | 28.059 | 629.4414 | 0.8  | 425.3763, 407.3697, 203.1782 | C <sub>36</sub> H <sub>62</sub> O <sub>7</sub>  | Ginsenoside CK-O/<br>Ginsenoside Rh <sub>2</sub> -O                                                |
| M92 | 28.509 | 687.4439 | -1.8 | 465.3676, 245.0630           | C <sub>38</sub> H <sub>64</sub> O <sub>9</sub>  | Ginsenoside CK/<br>Rh <sub>2</sub> +Acetyl                                                         |
| M93 | 28.845 | 627.4245 | -    | 459.2752                     | C <sub>36</sub> H <sub>60</sub> O <sub>7</sub>  | Ginsenoside Rk <sub>2</sub> /<br>ginsenoside Rh <sub>3</sub> / Iso-<br>ginsenoside Rh <sub>3</sub> |
| M94 | 30.106 | 687.4419 | -2.3 | 507.3782, 203.0517           | C <sub>38</sub> H <sub>64</sub> O <sub>9</sub>  | Ginsenoside CK/<br>Rh <sub>2</sub> +Acetyl                                                         |

**Table. S4: UPLC-QTOF-MS/MS data of metabolites of PNLs in the pseudo GF model group in the positive ion mode**

| No. | t <sub>R</sub> | [M+H] <sup>+</sup> /<br>[M+Na] <sup>+</sup> | Δpp<br>m | Fragment ions in the positive<br>mode     | Molecular<br>formular                           | Name                                                                                                                                        |
|-----|----------------|---------------------------------------------|----------|-------------------------------------------|-------------------------------------------------|---------------------------------------------------------------------------------------------------------------------------------------------|
| M4  | 8.119          | 945.5081                                    | -        | 783.4267, 747.4202,<br>203.1807           | C <sub>47</sub> H <sub>76</sub> O <sub>19</sub> | iso-Notoginsenoside<br>Rw <sub>1</sub> +Ace-2H                                                                                              |
| M23 | 11.433         | 1101.5833                                   | 1.5      | 789.4864, 335.0956                        | C <sub>53</sub> H <sub>90</sub> O <sub>22</sub> | Ginsenoside Rc/<br>Ginsenoside Rb <sub>2</sub> /<br>Ginsenoside Rb <sub>3</sub> /<br>Notoginsenoside L/<br>isomer                           |
| M95 | 12.301         | 661.4312                                    | 1.5      | 481.4312, 203.0531                        | C <sub>36</sub> H <sub>62</sub> O <sub>9</sub>  | Ginsenoside F <sub>1</sub> / Rh <sub>1</sub> /<br>isomer                                                                                    |
| M25 | 13.301         | 969.5477                                    | 7.4      | -                                         | C <sub>48</sub> H <sub>82</sub> O <sub>18</sub> | Ginsenoside Rd/<br>gypenoside XVII                                                                                                          |
| M33 | 13.962         | 943.5271                                    | 2.1      | 797.4708, 599.3943,<br>441.3748, 203.1796 | C <sub>48</sub> H <sub>78</sub> O <sub>18</sub> | Unknow                                                                                                                                      |
| M34 | 14.123         | 939.5303                                    | 2.3      | 335.0935, 203.0519                        | C <sub>47</sub> H <sub>80</sub> O <sub>17</sub> | Notoginsenoside Fe                                                                                                                          |
| M96 | 14.619         | 899.5356                                    | 1.9      | 767.5153, 605.4487,<br>407.3701, 203.1802 | C <sub>47</sub> H <sub>78</sub> O <sub>16</sub> | Notoginsenoside Fe-H <sub>2</sub> O/<br>isomer                                                                                              |
| M36 | 14.638         | 939.5342                                    | 2.3      | 747.3299, 335.0983                        | C <sub>47</sub> H <sub>80</sub> O <sub>17</sub> | Ginsenoside Rd <sub>2</sub>                                                                                                                 |
| M42 | 15.674         | 981.5429                                    | 4.1      | 785.5945, 668.4183,<br>243.2079           | C <sub>48</sub> H <sub>78</sub> O <sub>19</sub> | Gypenoside IX+Acetyl/<br>Notoginsenoside<br>Ft <sub>1</sub> +Acetyl/<br>Vinaginsenoside<br>R <sub>16</sub> +Acetyl/ R <sub>17</sub> +Acetyl |
| M39 | 15.669         | 661.4274                                    | 3.7      | 481.4274, 203.0572                        | C <sub>36</sub> H <sub>62</sub> O <sub>9</sub>  | Ginsenoside F <sub>1</sub> / Rh <sub>1</sub> /                                                                                              |

|     |        |           |      |                                 |                                                 |                                                                                                                                                       |
|-----|--------|-----------|------|---------------------------------|-------------------------------------------------|-------------------------------------------------------------------------------------------------------------------------------------------------------|
| M45 | 16.382 | 981.5404  | 4.2  | 669.4241, 335.0924              | C <sub>48</sub> H <sub>78</sub> O <sub>19</sub> | isomer<br>Gypenoside IX+Acetyl/<br>Notoginsenoside<br>Ft <sub>1</sub> +Acetyl/<br>Vinaginsenoside<br>R <sub>16</sub> +Acetyl/ R <sub>17</sub> +Acetyl |
| M47 | 16.59  | 807.4873  | 0.5  | 627.4243, 203.0497              | C <sub>42</sub> H <sub>72</sub> O <sub>13</sub> | 20-S-Ginsenoside F <sub>2</sub>                                                                                                                       |
| M48 | 16.759 | 1069.5732 | 5    | 923.5147, 567.4073,<br>423.3663 | C <sub>52</sub> H <sub>86</sub> O <sub>21</sub> | Gypenoside XLIX/<br>isomer                                                                                                                            |
| M49 | 16.795 | 939.5312  | 3    | -                               | C <sub>47</sub> H <sub>80</sub> O <sub>17</sub> | Gypenoside IX/<br>Notoginsenoside Ft <sub>1</sub> /<br>Vinaginsenoside R <sub>16</sub> / R <sub>17</sub> /<br>isomer                                  |
| M50 | 17.043 | 939.5315  | 1.5  | 497.1465                        | C <sub>47</sub> H <sub>80</sub> O <sub>17</sub> | Gypenoside IX/<br>Notoginsenoside Ft <sub>1</sub> /<br>Vinaginsenoside R <sub>16</sub> / R <sub>17</sub> /<br>isomer                                  |
| M52 | 18.36  | 807.4871  | -0.7 | 365.1082                        | C <sub>42</sub> H <sub>72</sub> O <sub>13</sub> | Ginsenoside Rg <sub>3</sub> / isomer                                                                                                                  |
| M55 | 18.623 | 849.4987  | 3.4  | 669.4334, 203.0507              | C <sub>44</sub> H <sub>74</sub> O <sub>14</sub> | Acetyl -ginsenoside Rg <sub>3</sub>                                                                                                                   |
| M54 | 18.736 | 939.5314  | 0.6  | -                               | C <sub>47</sub> H <sub>80</sub> O <sub>17</sub> | Gypenoside IX/<br>Notoginsenoside Ft <sub>1</sub> /<br>Vinaginsenoside R <sub>16</sub> / R <sub>17</sub> /<br>isomer                                  |
| M59 | 19.782 | 777.4772  | 7.6  | 335.0963, 203.0506              | C <sub>41</sub> H <sub>70</sub> O <sub>12</sub> | Ginsenoside MC/<br>Ginsenoside compound Y                                                                                                             |
| M60 | 19.819 | 777.477   | -1.8 | 335.0969, 203.0526              | C <sub>41</sub> H <sub>70</sub> O <sub>12</sub> | Ginsenoside MC/                                                                                                                                       |

|     |        |          |      |                    |                                                 |                                                                                                    |
|-----|--------|----------|------|--------------------|-------------------------------------------------|----------------------------------------------------------------------------------------------------|
| M61 | 20.271 | 777.4773 | 0.6  | 335.0958           | C <sub>41</sub> H <sub>70</sub> O <sub>12</sub> | Ginsenoside compound Y<br>Ginsenoside MC/<br>Ginsenoside compound Y                                |
| M63 | 20.478 | 777.4737 | -1.4 | 335.0952           | C <sub>41</sub> H <sub>70</sub> O <sub>12</sub> | Ginsenoside MC/<br>Ginsenoside compound Y                                                          |
| M68 | 20.909 | 921.5199 | 4.1  | -                  | C <sub>47</sub> H <sub>78</sub> O <sub>16</sub> | Notoginsenoside Ft <sub>1</sub> -<br>H <sub>2</sub> O/ isomer                                      |
| M69 | 21.397 | 921.5214 | 1    | 789.4911, 497.1334 | C <sub>47</sub> H <sub>78</sub> O <sub>16</sub> | Notoginsenoside Ft <sub>1</sub> -<br>H <sub>2</sub> O/ isomer                                      |
| M73 | 22.953 | 789.4798 | 4.5  | 365.11             | C <sub>42</sub> H <sub>70</sub> O <sub>12</sub> | Ginsenoside Rg <sub>5</sub> / Rk <sub>1</sub> /<br>isomer                                          |
| M74 | 23.214 | 499.3738 | -    | -                  | C <sub>30</sub> H <sub>52</sub> O <sub>4</sub>  | PPT                                                                                                |
| M76 | 23.366 | 819.4848 | 2.7  | 503.3473, 377.1032 | C <sub>43</sub> H <sub>74</sub> O <sub>13</sub> | Ginsenoside MC+Acetyl/<br>Ginsenoside compound<br>Y+Acetyl/ isomer                                 |
| M81 | 23.795 | 645.4328 | 1.4  | 465.3702, 203.0530 | C <sub>36</sub> H <sub>62</sub> O <sub>8</sub>  | 20-S-Ginsenoside Rh <sub>2</sub>                                                                   |
| M87 | 27.136 | 831.5481 | -2.1 | -                  | C <sub>44</sub> H <sub>72</sub> O <sub>13</sub> | Ginsenoside Rg <sub>5</sub> +Acetyl/<br>Rk <sub>1</sub> +Acetyl/ isomer                            |
| M89 | 27.775 | 819.4916 | 5.4  | 335.097            | C <sub>43</sub> H <sub>74</sub> O <sub>13</sub> | Ginsenoside MC+Acetyl/<br>Ginsenoside compound<br>Y+Acetyl/ isomer                                 |
| M92 | 28.439 | 687.4433 | 0.5  | 465.3702, 245.0625 | C <sub>38</sub> H <sub>64</sub> O <sub>9</sub>  | Ginsenoside CK/<br>Rh <sub>2</sub> +Acetyl                                                         |
| M93 | 28.738 | 627.4167 | 4.3  | -                  | C <sub>36</sub> H <sub>60</sub> O <sub>7</sub>  | Ginsenoside Rk <sub>2</sub> /<br>ginsenoside Rh <sub>3</sub> / Iso-<br>ginsenoside Rh <sub>3</sub> |

M97 29.26 629.505 -5.6 -

$C_{36}H_{62}O_7$  Ginsenoside CK-O/  
Ginsenoside Rh<sub>2</sub>-O

---
