# Supplementary material for: Metabolic characteristics of saponins from Panax notoginseng leaves biotransformed by gut microbiota in rats
Source: Royal Society of Chemistry journal article supplement (doi:10.1039/d4ay01941e), 2025-01-01
Supplement: d4ay01941e3.pdf [file d4ay01941e3.pdf]

## 1 **Supporting Information**

2 **Fig. S1** Characterization of standard ginsenosides in the positive -ion mode.

3 **Fig. S2** Metabolic characterization of PNLS in the positive -ion mode. **(A)** PNLS; **(B)**

4 Blank stool samples and samples collected at 10 h from the control group; **(C)** Blank

5 stool samples and samples collected at 10 h from the pseudo-GF model group.

6 **Fig. S3** Relative abundance of GCK in all samples from control and pseudo-GF model

7 groups.  $**p < 0.01$  and  $***p < 0.001$  between the control and pseudo-GF model

8 groups

9

10
