# Supplementary figures and images for: Metabolic characteristics of saponins from Panax notoginseng leaves biotransformed by gut microbiota in rats
Source: Royal Society of Chemistry journal article supplement (doi:10.1039/d4ay01941e), 2025-01-01

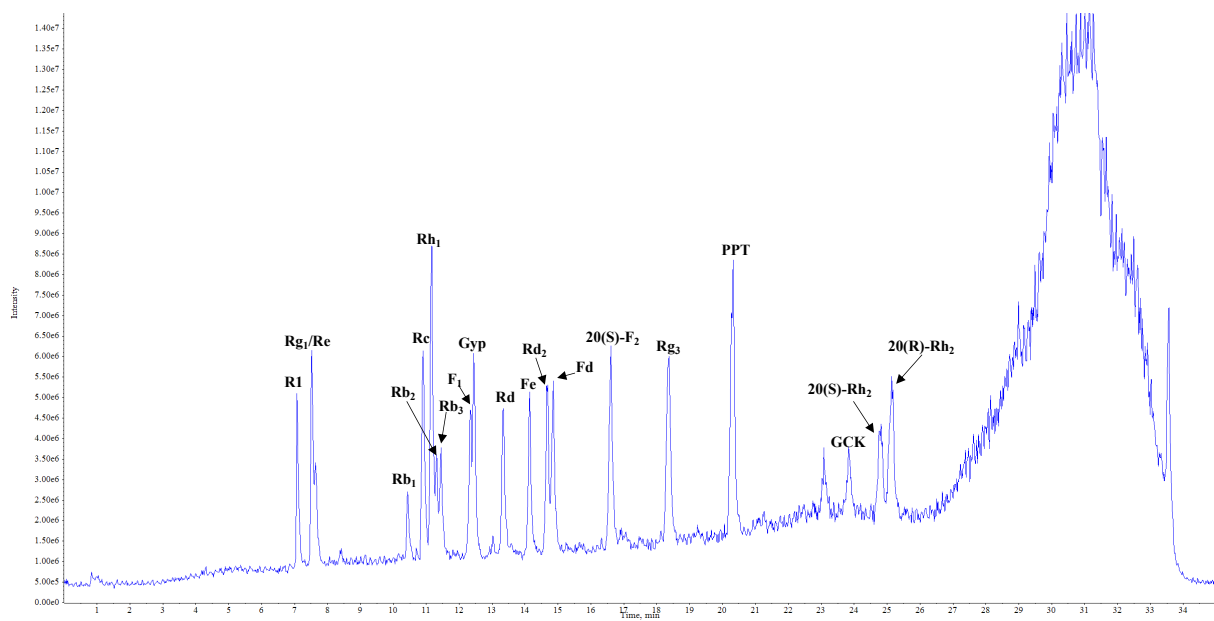

**A**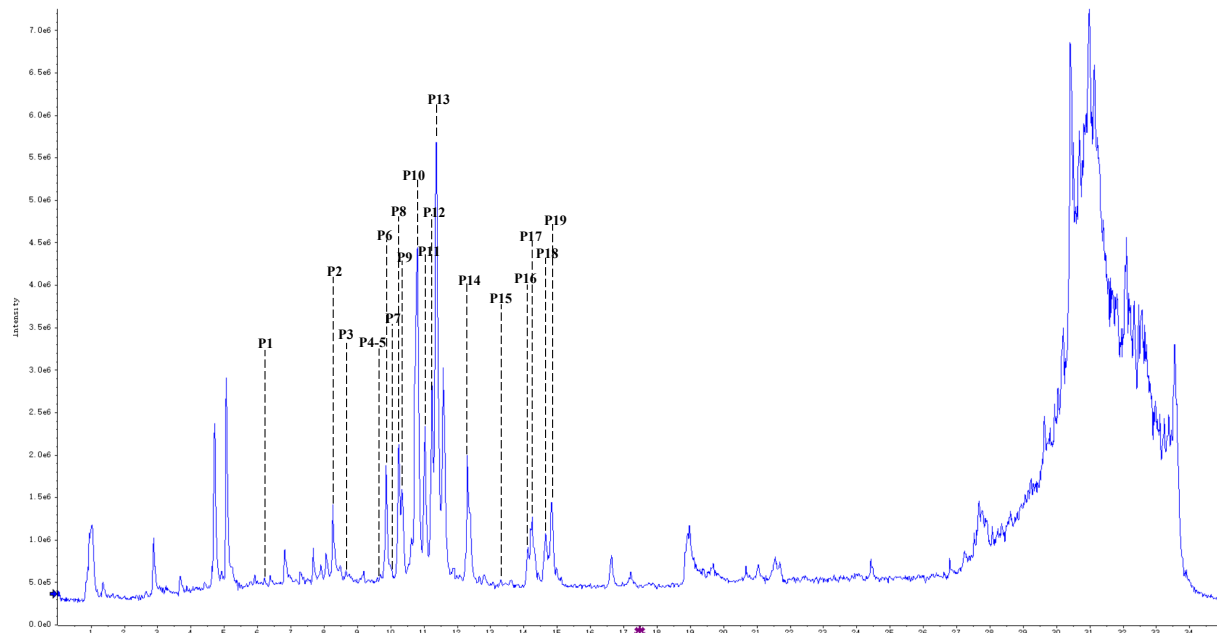**B**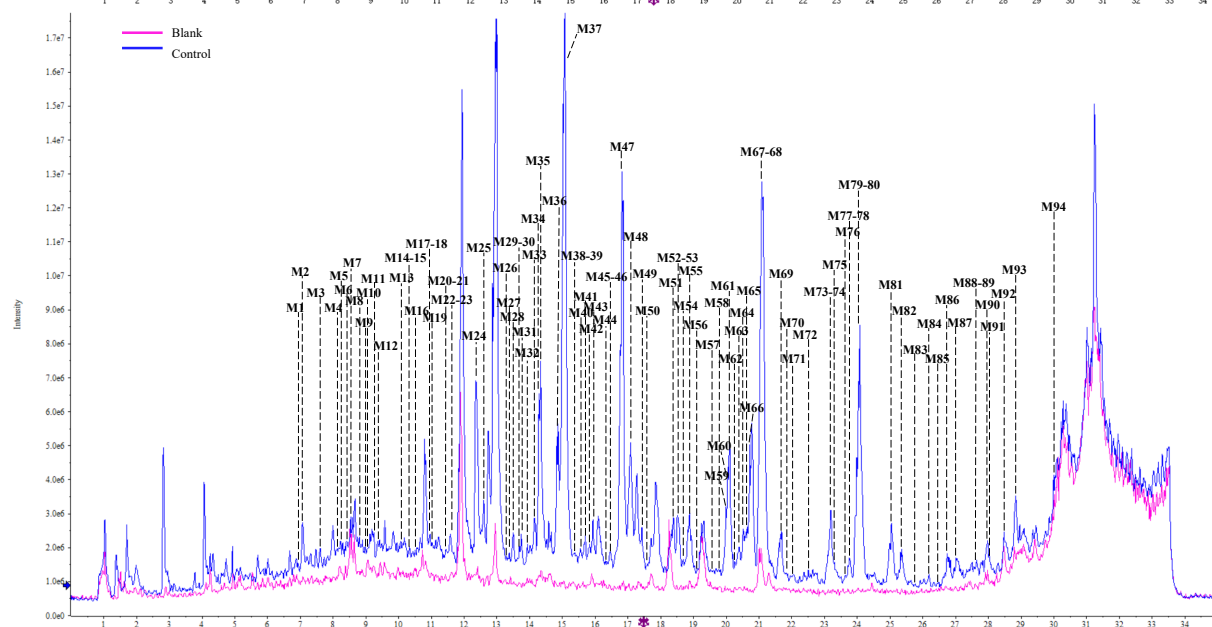**C**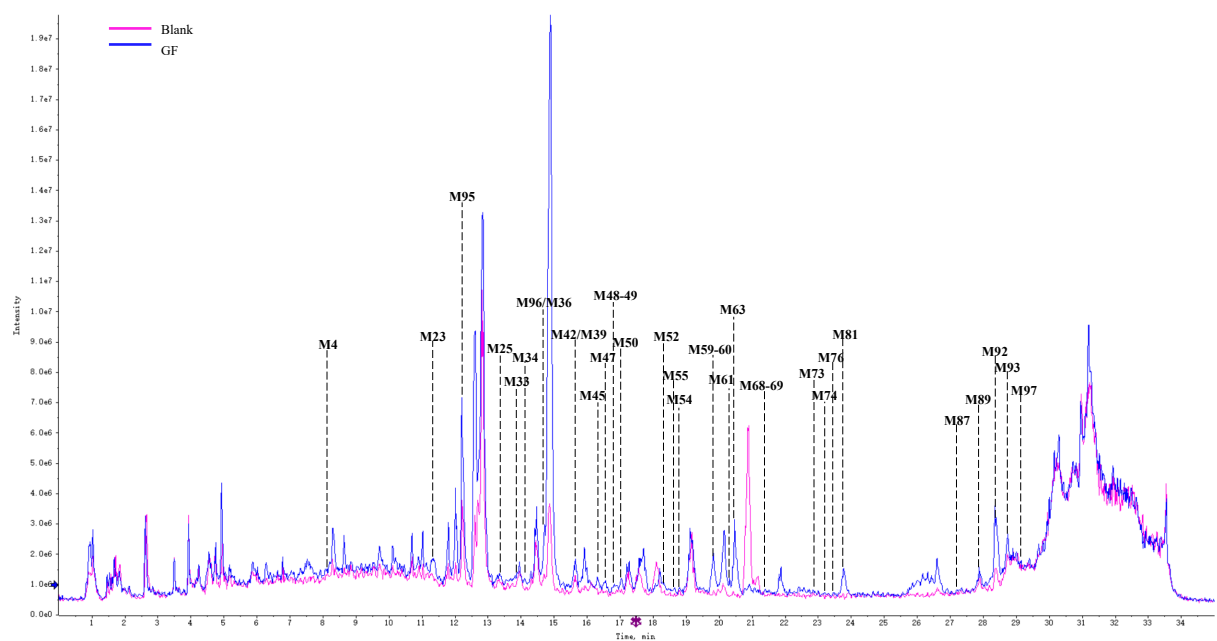

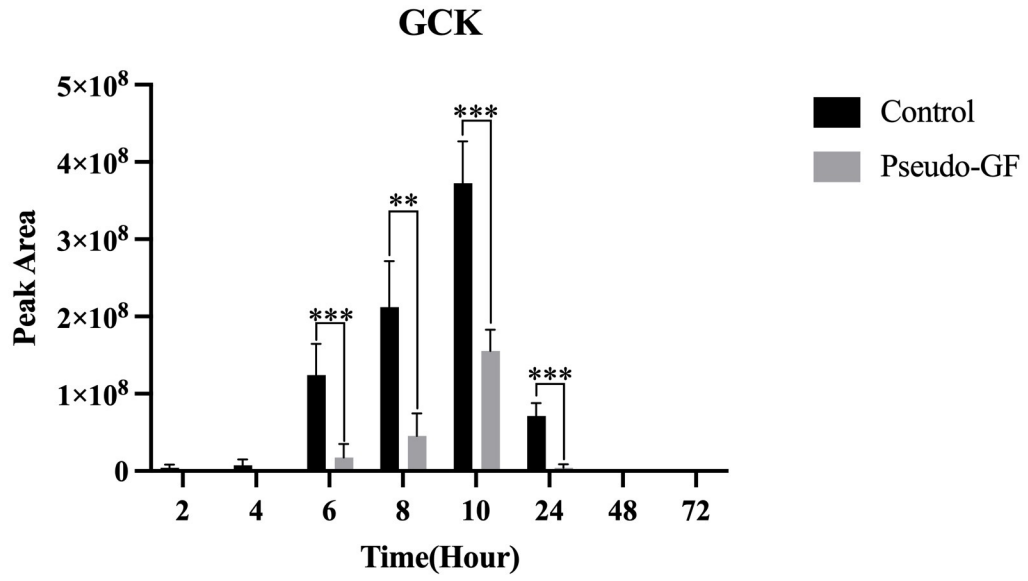

Supplement: d4ay01941e2.pdf [file d4ay01941e2.pdf]
